# Supplementary material for: Cysteine modifiers suggest an allosteric inhibitory site on the CAL PDZ domain
Source: PubMed Central journal article supplement (PMC6435542; doi:10.1042/bsr20180231), 2018-07-06
Supplement: bsr20180231_Supp1.pdf [file bsr20180231_Supp1.pdf]

## Supplementary Material for:

# Cysteine modifiers suggest an allosteric inhibitory site on the CAL PDZ domain

Yu Zhao<sup>1,\*</sup>, Patrick R. Cushing<sup>1,\*</sup>, David C. Smithson<sup>2</sup>, Maria Pellegrini<sup>3</sup>, Sahar Al-Ayyoubi<sup>1</sup>,  
Andrew V. Grasseti<sup>1</sup>, Scott A. Gerber<sup>1,4</sup>, R. Kiplin Guy<sup>2</sup> and Dean R. Madden<sup>1,\*\*</sup>

<sup>1</sup>Departments of Biochemistry & Cell Biology and <sup>4</sup>Department of Molecular & Systems  
Biology, Geisel School of Medicine at Dartmouth, Hanover, NH 03755, USA

<sup>2</sup>Department of Chemical Biology and Therapeutics, St. Jude Children's Research Hospital,  
Memphis, TN 38105, USA

<sup>3</sup>Department of Chemistry, Dartmouth College, Hanover, NH03755, USA

[\*] Equal contribution

[\*\*] **Corresponding author: Dean R. Madden, Dept. of Biochemistry & Cell Biology, Geisel  
School of Medicine, 7200 Vail Building, Hanover, NH 03755 USA. Tel: +1-603-650-1164.**

**Email: [drm0001@dartmouth.edu](mailto:drm0001@dartmouth.edu)**

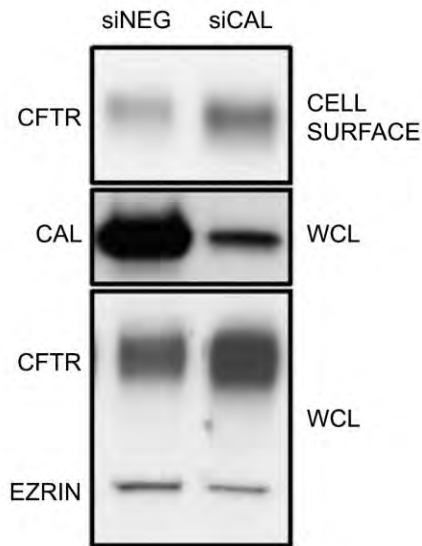

**Figure S1: CAL-specific RNA interference increases cell-surface and WCL abundance of WT-CFTR**

Polarized CFBE cells expressing WT-CFTR (WT-CFBE cells) were treated with CAL-specific (siCAL) or negative control (siNEG) siRNA. Cells were grown on filters at an air-liquid interface for three days, and then surface proteins were biotinylated. Cells were lysed and biotinylated protein were captured by streptavidin beads and probed to determine CFTR levels. Ezrin: loading control marker. The knockdown efficiency of siCAL was  $86 \pm 11\%$  ( $n=3$ ).

Following normalization to an ezrin loading control, surface biotinylated and whole-cell lysate (WCL) CFTR siCAL-treated cells showed statistically significant average increases of 2.33-fold ( $p = 0.00007$ ) and 1.65-fold ( $p = 0.00021$ ), respectively, compared to siNEG-treated controls. Statistics were calculated from three independent experiments each with two or four replicates, using a linear mixed-effects model in R (package nlme).

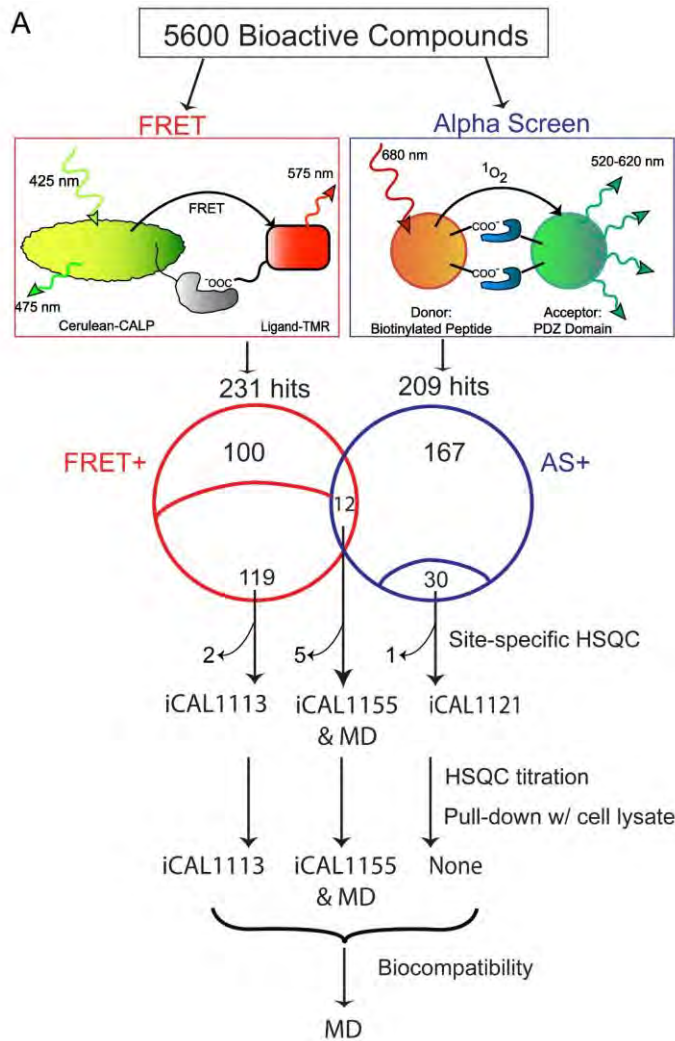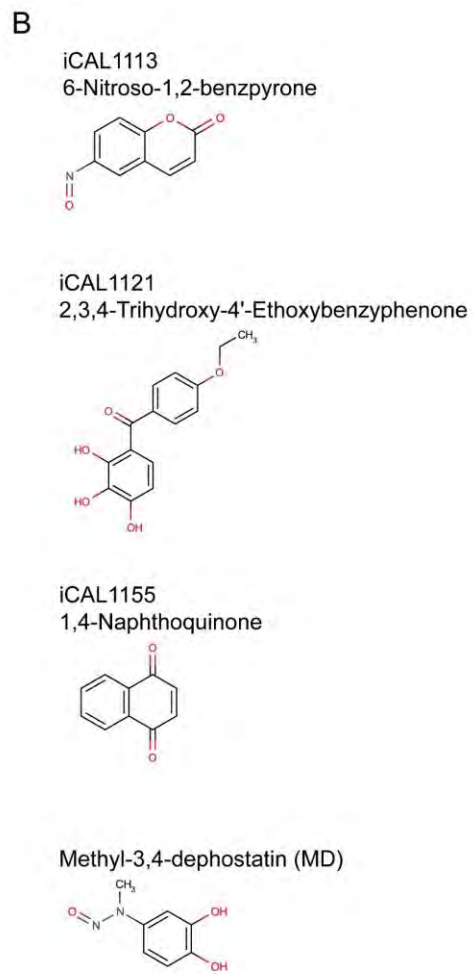

## Figure S2: The overall screening strategy

(A) The flow chart of the screening strategy. In a FRET screen (red box and circle) of the St. Jude bioactive collection (5600 wells), a Cerulean domain fused to CALP acts as a donor to the TMR label attached to reporter peptide iCAL36. Inhibitors reduce the FRET signal measured as the ratio of fluorescence intensities  $F_{575\text{ nm}}/F_{475\text{ nm}}$ . In the Alpha-Screen (blue box and circle), a biotinylated peptide attached to streptavidin donor beads interacts with polyhistidine-tagged CerCALP attached to NiNTA acceptor beads, permitting proximity-based exchange of singlet oxygen. Inhibitors disrupt the coupling, decrease acceptor-bead emission. Only 12 compounds were identified by both screens, one of which was eliminated as a likely fluorescence artifact. In the NMR secondary screen, 12 FRET<sup>+</sup>/AS<sup>+</sup> compounds, 119 FRET<sup>+</sup>/AS<sup>-</sup> and 30 AS<sup>+</sup>/FRET<sup>-</sup> compounds were tested using single-point NMR <sup>1</sup>H-<sup>15</sup>N HSQC spectra. Among the compounds that disrupted binding, five from the FRET<sup>+</sup>/AS<sup>+</sup> set, two from the FRET<sup>+</sup>/AS<sup>-</sup> set, and one from the AS<sup>+</sup>/FRET<sup>-</sup> set acted as protein aggregators. Tests for saturable binding and ability to inhibit endogenous CAL in a pull-down assay eliminated an additional compound. Three candidates demonstrated saturable binding and site-specific footprints. Biocompatibility assays validated MD as the primary lead. (B) The chemical identities and schematics of the four HSQC validated site-specific interactors.

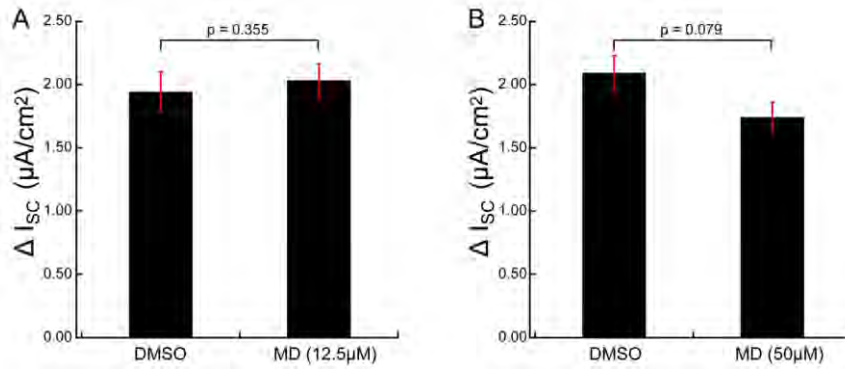

**Figure S3. Ussing-chamber measurements show that MD does not stimulate CFTR chloride currents in CFBE- $\Delta F$  cells**

MD was applied to polarized CFBE- $\Delta F$  cells at a final concentration of 12.5  $\mu M$  (A; n=6) or 50  $\mu M$  (B, n=8). The change in short-circuit current ( $I_{sc}$ ) was measured in response to CFTR<sub>inh</sub>172 ( $\Delta I_{sc}$ ). No significant changes were seen in either case, although a trend to lower current was observed at the higher dose.

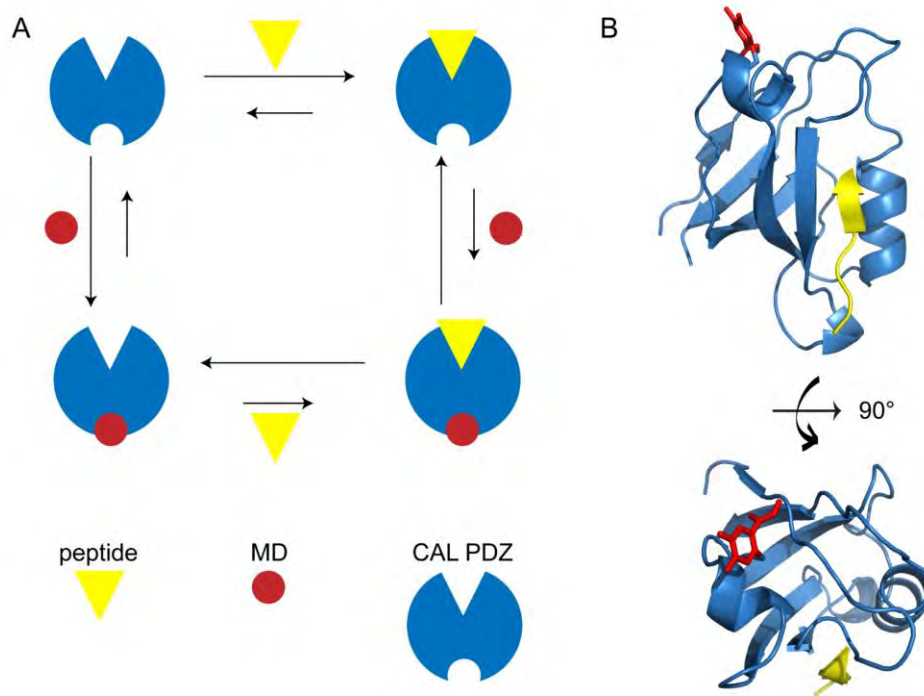

**Figure S4. Hetero-trimer formation**

(A) Due to the non-competitive mode of inhibition, high concentrations of peptide ligand (yellow triangles) and MD inhibitor (red dots) can drive formation of a hetero-trimer with the CAL PDZ domain (blue notched circle). The hetero-trimer corresponds to the structure determined by co-crystallization in (B). (B) PyMOL views of the hetero-trimer CALP:HPV18E6:MD (PDB ID **5IC3**). CALP (blue); peptide HPV18E6 (yellow); MD (red).

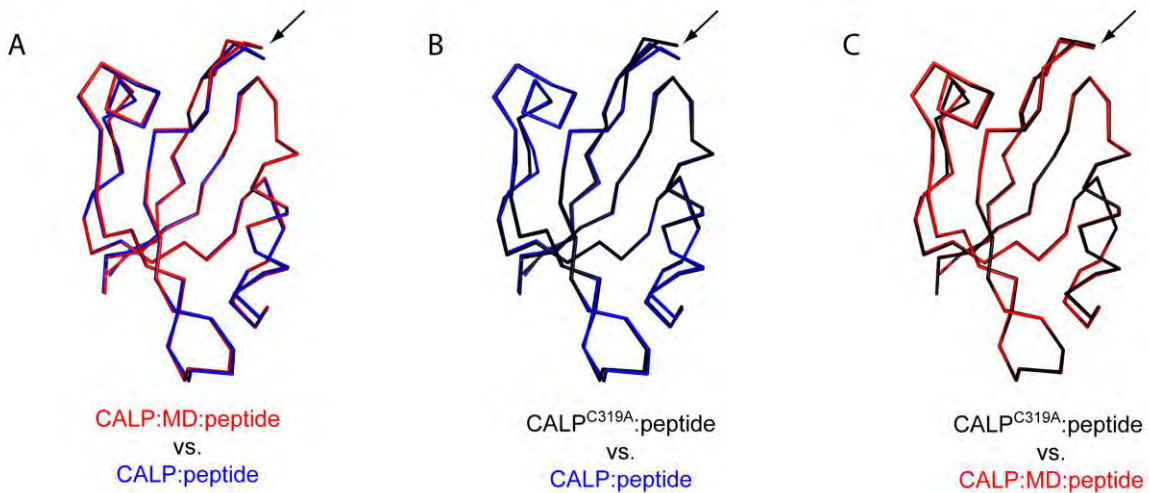

**Figure S5. Alignments of the models of CALP complexes**

(A) CALP:MD:peptide model **5IC3** (red, chain A) aligned with CALP:peptide model **4JOR** (blue, chain A) (RMSD = 0.213 Å; 504 atoms). Black arrow points to the loop movement seen between the two models.

(B) CALP<sup>C319A</sup>:peptide model **5K4F** (black, chain A) aligned with CALP:peptide model **4JOR** (blue, chain A) (RMSD = 0.213 Å; 472 atoms). Black arrow points to the loop movement seen between the two models.

(C) CALP<sup>C319A</sup>:peptide model **5K4F** (black, chain A) aligned with the CALP:MD:peptide model **5IC3** (red, chain A) (RMSD = 0.119 Å; 445 atoms). Black arrow points to the very close overlay of the loops in the two models.

PyMOL was used to perform all the alignments.

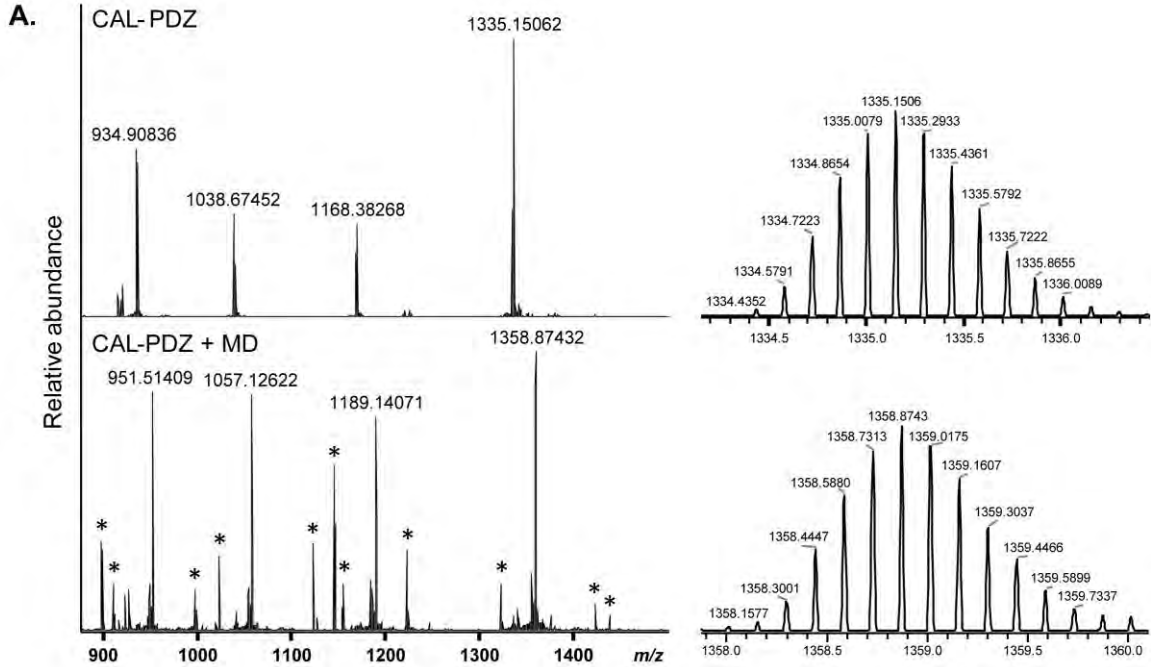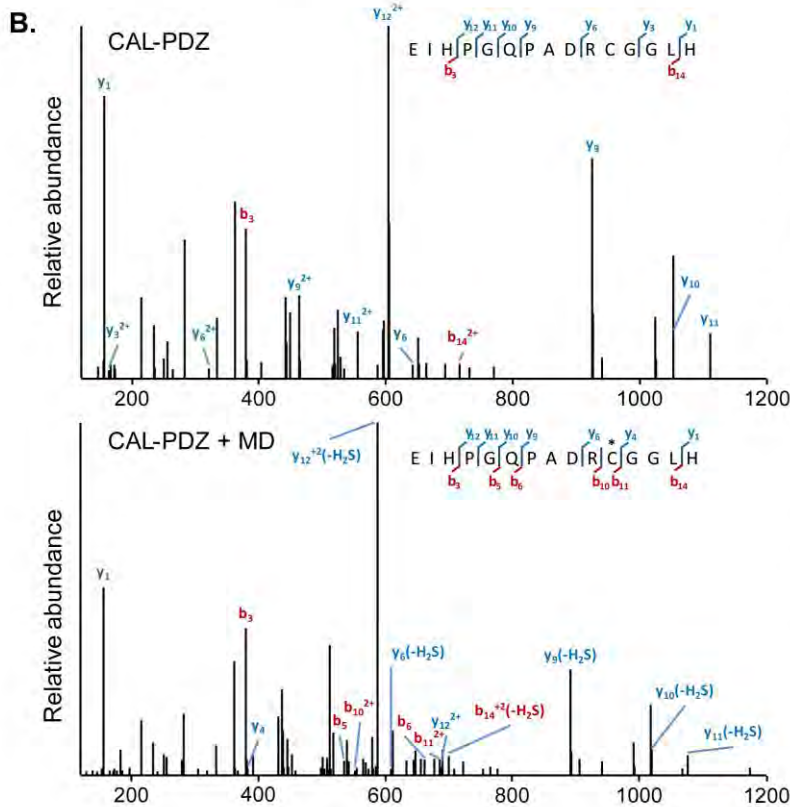

**C. Crystallization**

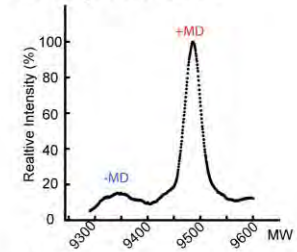

**D. NMR**

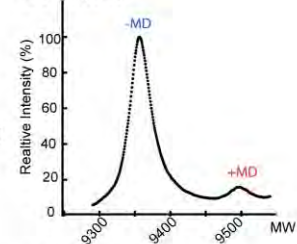

**E. Screen**

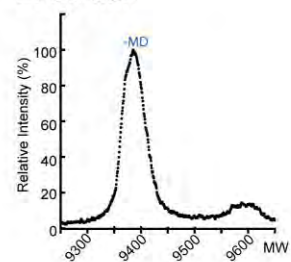



### Figure S6. Mass spectrometry confirms the covalent attachment of MD

(A) Intact electrospray ionization Orbitrap analysis at 240,000 resolution (FWHM @ 200  $m/z$ ) shows the intact CAL-PDZ domain by itself (upper) and modified by MD (lower). The left panels show charge states from  $(M+H^+)^{7+}$  to  $(M+H^+)^{10+}$ , ranging from 875 to 1,500 Thomson. The right panels show zoomed views of the  $(M+H^+)^{7+}$  isotopic envelopes that illustrate the shift in mass of CAL-PDZ by covalent addition of MD. Asterisks indicate non-specific MD background ions not related to CAL-PDZ ( $z < 4$ ).

(B) Annotated MS<sup>2</sup> spectra are shown for native (upper) or adducted (lower) CAL-PDZ peptides derived from proteinase-K digests and containing Cys<sup>319</sup> with or without the MD covalent modification. In addition to differences in parent ion mass  $< 2.5$  parts-per-million (ppm) from theoretical, the mass of the modification is identified in the  $b_{11}^{2+}$  and  $y_{12}^{2+}$  fragment ions from CAL-PDZ + MD. Additionally, the presence of the modification was inferred in fragment ions  $b_{14}^{2+}$ ,  $y_6^{2+}$ ,  $y_9^{2+}$ ,  $y_{10}^{2+}$ ,  $y_{11}^{2+}$ , and  $y_{12}^{2+}$  wherein ions consistent with the additional loss of H<sub>2</sub>S are observed.

MALDI-TOF confirmed that (C) under crystallization conditions, over 85% of CALP was modified by MD (n=3); (D) under the NMR condition (with 125  $\mu$ M MD), about 13% of CALP was modified by MD; (E) under FRET screening conditions, CALP was not modified by MD (n=3).

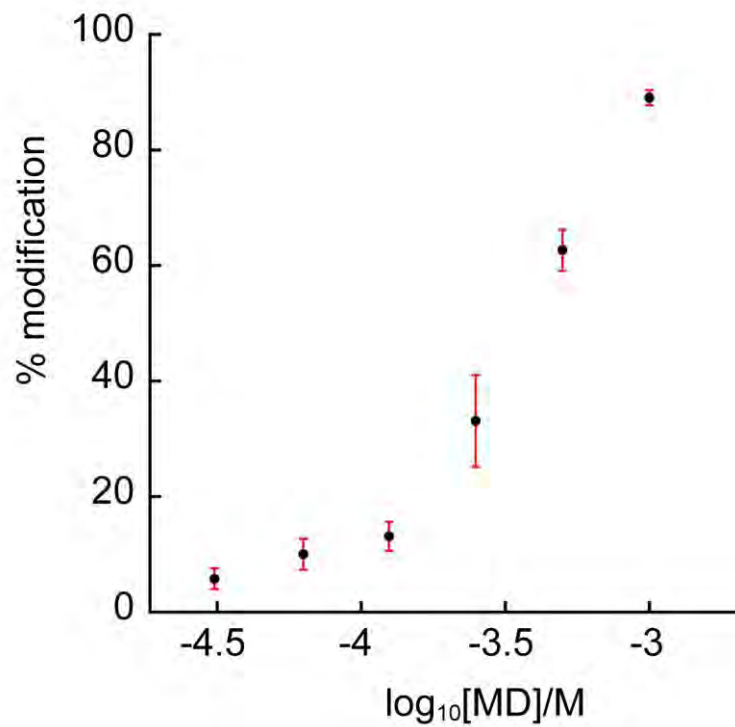

**Figure S7. CALP-MD adduct formation with different MD concentrations under NMR conditions**

Percentage of CALP-MD adduct formation after co-incubation was measured by MALDI-TOF.

Peak mass was determined for signals corresponding to either CALP or CALP-MD (n=3). 50  $\mu\text{M}$

CALP was incubated with different concentrations of MD. Significant CALP-MD adduct

formation was observed for MD concentrations at or above 250  $\mu\text{M}$ .

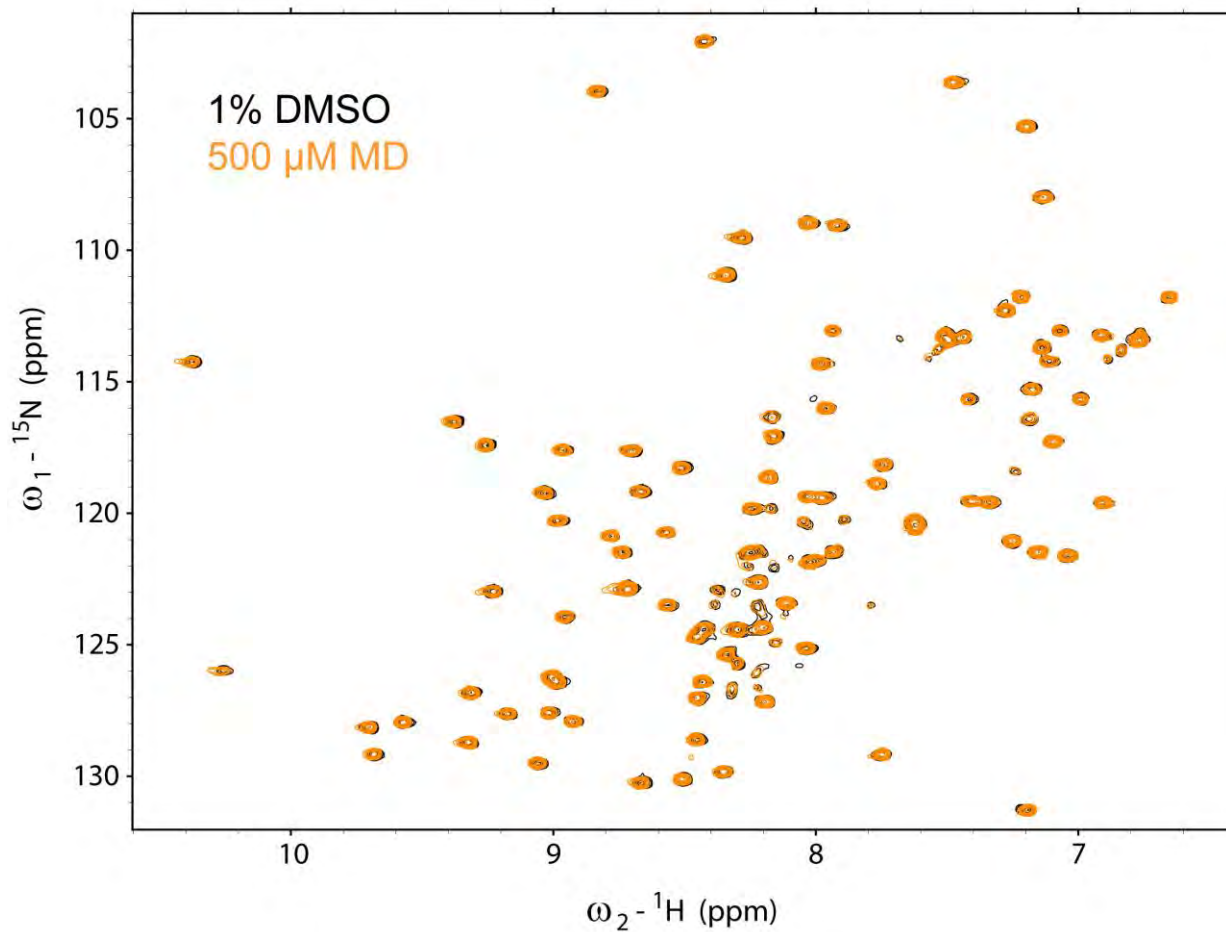

**Figure S8. NMR HSQC titration of MD with CALP<sup>C319A</sup>**

HSQC spectra are shown for 50  $\mu\text{M}$   ${}^{15}\text{N}$ - CALP<sup>C319A</sup> with 500  $\mu\text{M}$  MD (orange) overlaid with vehicle control (1% DMSO, black). No significant chemical shift perturbations were observed upon addition of 500  $\mu\text{M}$  MD, suggesting that no observable binding occurred between MD and CALP<sup>C319A</sup> under the condition tested. A two-fold HSQC titration was performed using concentrations of MD between 15  $\mu\text{M}$  and 1 mM, and similar results were observed (data not shown).

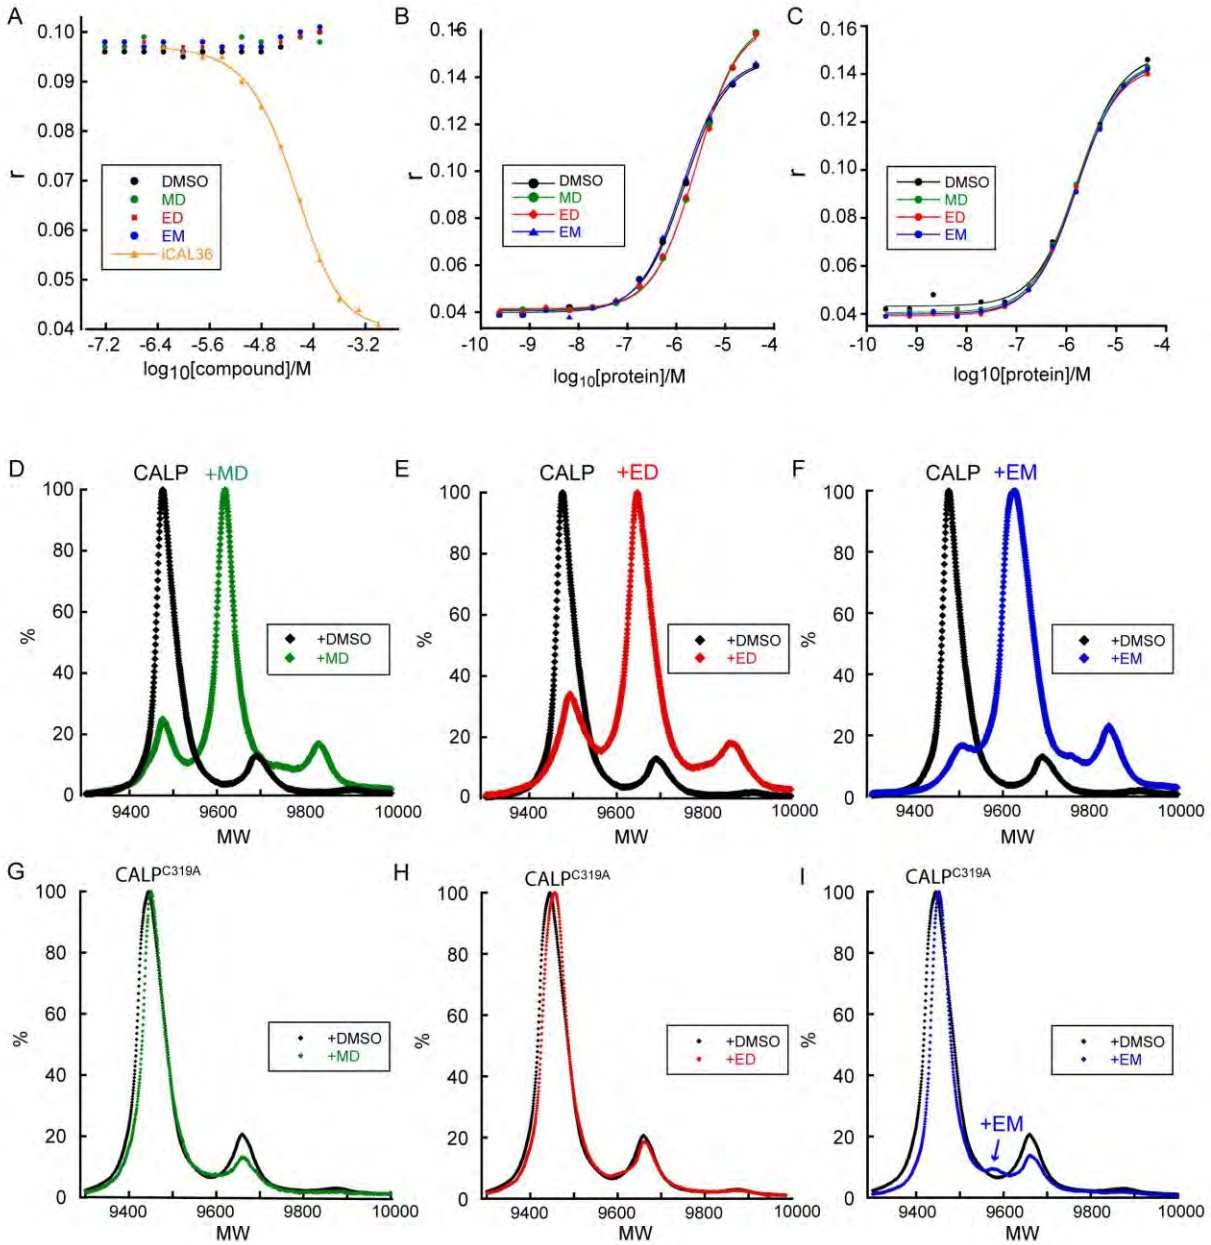

**Figure S9. FP measurements of the inhibition effects of MD, ED and EM**

(A) FP competition assay to measure the  $K_i$  of MD, ED and EM at pH6.8 (25 mM sodium phosphate [pH 6.8], 150 mM sodium chloride, 0.1 mM TCEP, 0.02% sodium azide) that disfavor covalent modification of CAL PDZ (see Figure S6D). DMSO was the negative control; peptide inhibitor iCAL36 was the positive control. The figure represents one of three independent

measurements. (B) FP binding assay of DMSO-, MD-, ED- or EM- treated CALP. The figure represents three independent measurements. (C) FP binding assay DMSO-, MD-, ED- or EM- treated CALP<sup>C319A</sup>. The figure represents three independent measurements. (D-F) MALDI-TOF curves show the modification status of CALP following incubation with MD (D), ED (E), or EM (F) used in the FP binding assays shown in (B). (G-I) MALDI-TOF curves show the modification status of CALP<sup>C319A</sup> following incubation with MD (G), ED (H), or EM (I) used in the FP binding assays shown in (C).
